# Supplementary material for: Biology in the Dry Seed: Transcriptome Changes Associated with Dry Seed Dormancy and Dormancy Loss in the Arabidopsis GA-Insensitive sleepy1-2 Mutant
Source: Front Plant Sci. 2017 Dec 22;8:2158. doi: 10.3389/fpls.2017.02158 (PMC5744475; doi:10.3389/fpls.2017.02158)
Supplement: Supplementary file 2 [file Table_2.XLSX]

## Sheet: AR-up-regulated
Supplementary Table 2: Table of genes similarly regulated between sly1-2 and Cvi ARvsD dry seeds (split into UP-regulated and DOWN-regulated sheets)
AGI identifier	Gene symbol	Description
AT2G43520	ATTI2	Encodes putative trypsin inhibitor protein which may function in defense against herbivory. Member of the defensin-like (DEFL) family.
AT3G24500	ATMBF1C, MBF1C	One of three genes in A. thaliana encoding multiprotein bridging factor 1, a highly conserved transcriptional coactivator. May serve as a bridging factor between a bZIP factor and TBP. Its expression is specifically elevated in response to pathogen infection, salinity, drought, heat, hydrogen peroxide, and application of abscisic acid or salicylic acid. Constitutive expression enhances the tolera…
AT5G52780	NA	similar to unknown protein [Arabidopsis thaliana] (TAIR:AT4G19100.1); similar to hypothetical protein MtrDRAFT_AC134521g30v1 [Medicago truncatula] (GB:ABE93878.1)
AT2G47730	ATGSTF5, ATGSTF8, GST6, GSTF8	Encodes glutathione transferase belonging to the phi class of GSTs. Naming convention according to Wagner et al. (2002)., Encodes glutathione transferase belonging to the phi class of GSTs. Naming convention according to Wagner et al. (2002)., Encodes glutathione transferase belonging to the phi class of GSTs. Naming convention according to Wagner et al. (2002)., Encodes glutathione transferase b…
AT2G23110	NA	similar to unknown protein [Arabidopsis thaliana] (TAIR:AT2G23120.1); similar to seed maturation protein PM35 [Glycine max] (GB:AAD51623.1)
AT3G25900	ATHMT-1, HMT-1, ATHMT-1, HMT-1	ATHMT-1/HMT-1; homocysteine S-methyltransferase; Identical to Homocysteine S-methyltransferase 1 (EC 2.1.1.10) (S- methylmethionine:homocysteine methyltransferase 1) (SMM:Hcy S- methyltransferase 1) (AtHMT-1) (HMT-1) [Arabidopsis Thaliana] (GB:Q9SDL7); similar to HMT3 (Homocysteine S-methyltransferase 3), homocysteine S-methyltransferase [Arabidopsis thaliana] (TAIR:AT3G22740.1); similar to Os03g…
AT4G33666	NA	unknown protein
AT1G79040	PSBR	Encodes for the 10 kDa PsbR subunit of photosystem II (PSII). This subunit appears to be involved in the stable assembly of PSII, particularly that of the oxygen-evolving complex subunit PsbP. Mutants defective in this gene have reduced amounts of subunits PsbP and PsbQ in PSII. In turn, assembly of PsbR is dependent on the presence of PsbJ.
AT1G32920	NA	similar to unknown protein [Arabidopsis thaliana] (TAIR:AT1G32928.1)
AT5G06860	ATPGIP1, PGIP1	polygalacturonase inhibiting protein 1 (PGIP1) mRNA,, polygalacturonase inhibiting protein 1 (PGIP1) mRNA,
AT3G26220	CYP71B3	cytochrome P450 monooxygenase
AT1G15010	NA	similar to unknown protein [Arabidopsis thaliana] (TAIR:AT2G01300.1); similar to Os01g0121500 [Oryza sativa (japonica cultivar-group)] (GB:NP_001041876.1); similar to Os01g0121600 [Oryza sativa (japonica cultivar-group)] (GB:NP_001041877.1)
AT1G80920	J8	J8 mRNA, nuclear gene encoding plastid protein, complete
AT3G21700	ATSGP2, SGP2, ATSGP2, SGP2	GTP binding; similar to GTP-binding family protein [Arabidopsis thaliana] (TAIR:AT5G54840.1); similar to Ras small GTPase, Rab type [Medicago truncatula] (GB:ABE83942.1); contains InterPro domain Miro-like; (InterPro:IPR013684); contains InterPro domain Ras GTPase; (InterPro:IPR001806), GTP binding; similar to GTP-binding family protein [Arabidopsis thaliana] (TAIR:AT5G54840.1); similar to Ras sm…
AT1G24600	NA	similar to unknown protein [Arabidopsis thaliana] (TAIR:AT1G67920.1)
AT4G04620	ATG8B	ATG8B (AUTOPHAGY 8B); microtubule binding; similar to APG8A (autophagy 8A) [Arabidopsis thaliana] (TAIR:AT4G21980.2); similar to microtubule-associated protein 1 light chain 3 [Gossypium hirsutum] (GB:AAQ76706.1); similar to Os08g0191600 [Oryza sativa (japonica cultivar-group)] (GB:NP_001061171.1); contains InterPro domain Light chain 3 (LC3); (InterPro:IPR004241)
AT4G27140	NA	2S seed storage protein 1 / 2S albumin storage protein / NWMU1-2S albumin 1; Identical to 2S seed storage protein 1 precursor (2S albumin storage protein) (NWMU2-2S albumin 1) [Contains: 2S seed storage protein 1 small subunit; 2S seed storage protein 1 large subunit] (AT2S1) [Arabidopsis Thaliana] (GB:P15457); similar to 2S seed storage protein 4 / 2S albumin storage protein / NWMU2-2S albumin 4…
AT5G09760	NA	pectinesterase family protein; similar to pectinesterase family protein [Arabidopsis thaliana] (TAIR:AT5G64640.1); similar to 52O08_4 [Brassica rapa subsp. pekinensis] (GB:AAZ67549.1); contains InterPro domain Virulence factor, pectin lyase fold; (InterPro:IPR011050); contains InterPro domain Plant invertase/pectin methylesterase inhibitor; (InterPro:IPR007186); contains InterPro domain Pectinest…
AT5G67350	NA	similar to hypothetical protein MtrDRAFT_AC144765g16v1 [Medicago truncatula] (GB:ABE87032.1)
AT5G65660	NA	hydroxyproline-rich glycoprotein family protein; similar to putative AFG1-like ATPase [Oryza sativa (japonica cultivar-group)] (GB:AAO20064.1)
AT1G05430	NA	similar to hypothetical protein MtrDRAFT_AC135320g13v1 [Medicago truncatula] (GB:ABE82965.1)
AT4G33150	LKR, LKR/SDH, SDH, LKR, LKR/SDH, SDH, LKR, LKR/SDH, SDH	LKR (SACCHAROPINE DEHYDROGENASE); Identical to Alpha-aminoadipic semialdehyde synthase (LKR/SDH) (cAt-LKR/SDH) [Includes: Lysine ketoglutarate reductase (EC 1.5.1.8) (LKR); Saccharopine dehydrogenase (EC 1.5.1.9) (SDH) (cAt-SDH)] (LKR/SDH) [Arabidopsis Thaliana] (GB:Q9SMZ4;GB:O04155;GB:O04156;GB:O04884;GB:Q7DM71;GB:Q947M5;GB:Q94BT4); similar to bifunctional lysine-ketoglutarate reductase/saccharo…
AT3G07090	NA	similar to unknown protein [Arabidopsis thaliana] (TAIR:AT5G25170.1); similar to expressed protein [Oryza sativa (japonica cultivar-group)] (GB:ABB47783.1); similar to unknown protein [Oryza sativa] (GB:AAG16855.1); similar to Os02g0814000 [Oryza sativa (japonica cultivar-group)] (GB:NP_001048488.1); contains InterPro domain Protein of unknown function DUF862, eukaryotic; (InterPro:IPR008580)
AT1G62510	NA	protease inhibitor/seed storage/lipid transfer protein (LTP) family protein; similar to ELP (EXTENSIN-LIKE PROTEIN), lipid binding [Arabidopsis thaliana] (TAIR:AT1G12090.1); similar to proline-rich SAC51 [Brassica napus] (GB:AAC60566.1); contains InterPro domain Plant lipid transfer/seed storage/trypsin-alpha amylase inhibitor; (InterPro:IPR003612)
AT4G32150	ATVAMP711, VAMP711	AtVAMP711 is a member of Synaptobrevin-like AtVAMP7C, v-SNARE (soluble N-ethyl-maleimide sensitive factor attachment protein receptors) protein family. SNAREs have been divided into four subgroups: Qa-, Qb-, Qc- and R-SNAREs. R-SNAREs are classified into three groups, the Sec22-, YKT6- and VAMP7-like R-SNAREs. One R-SNARE and three Q-SNAREs (one of each subgroup) form the trans-SNARE complex, whi…
AT5G54170	NA	similar to CP5 [Arabidopsis thaliana] (TAIR:AT1G64720.1); similar to putative nodule membrane protein [Medicago sativa] (GB:AAL57201.1); contains InterPro domain Lipid-binding START; (InterPro:IPR002913)
AT5G14180	MPL1	lipase family protein; Identical to Triacylglycerol lipase 2 precursor (EC 3.1.1.3) (LIP2) [Arabidopsis Thaliana] (GB:Q67ZU1;GB:Q681B0;GB:Q6VY31;GB:Q94AE7;GB:Q9FMT2;GB:Q9FMT3); similar to ATLIP1 (ARABIDOPSIS THALIANA LIPASE 1), galactolipase/ hydrolase/ phospholipase/ triacylglycerol lipase [Arabidopsis thaliana] (TAIR:AT2G15230.1); similar to lipase [Ricinus communis] (GB:AAY17358.1); contains I…
AT1G48830	NA	40S ribosomal protein S7 (RPS7A); Identical to 40S ribosomal protein S7-1 (RPS7A) [Arabidopsis Thaliana] (GB:Q9C514); similar to 40S ribosomal protein S7 (RPS7B) [Arabidopsis thaliana] (TAIR:AT3G02560.2); similar to 40S ribosomal protein S7-like protein [Solanum tuberosum] (GB:ABA40437.1); contains InterPro domain Ribosomal protein S7E; (InterPro:IPR000554)
AT4G00850	GIF3	Arabidopsis thaliana GRF1-interacting factor 3 (GIF3) mRNA
AT4G37430	CYP81F1, CYP91A2	Encodes a member of the CYP81F cytochrome P450 monooxygenase subfamily., Encodes a member of the CYP81F cytochrome P450 monooxygenase subfamily.
AT4G02410	NA	lectin protein kinase family protein; similar to lectin protein kinase, putative [Arabidopsis thaliana] (TAIR:AT3G53810.1); similar to RLK (RECEPTOR LECTIN KINASE), kinase [Arabidopsis thaliana] (TAIR:AT2G37710.1); similar to lectin protein kinase, putative [Arabidopsis thaliana] (TAIR:AT4G02420.1); similar to receptor kinase Lecrk [Gossypium hirsutum] (GB:AAP47579.1); similar to lectin-like rece…
AT2G45820	NA	DNA-binding protein, putative; similar to DNA-binding family protein / remorin family protein [Arabidopsis thaliana] (TAIR:AT3G61260.1); similar to DNA-binding protein (GB:AAA57124.1); contains InterPro domain Remorin, N-terminal region; (InterPro:IPR005518); contains InterPro domain Remorin, C-terminal region; (InterPro:IPR005516)
AT2G42680	ATMBF1A, MBF1A	One of three genes in A. thaliana encoding multiprotein bridging factor 1, a highly conserved transcriptional coactivator. May serve as a bridging factor between a bZIP factor and TBP. Its expression is developmentally regulated., One of three genes in A. thaliana encoding multiprotein bridging factor 1, a highly conserved transcriptional coactivator. May serve as a bridging factor between a bZIP…
AT2G45570	CYP76C2	member of CYP76C
AT2G44130	NA	kelch repeat-containing F-box family protein; similar to kelch repeat-containing F-box family protein [Arabidopsis thaliana] (TAIR:AT3G59940.1); similar to Cyclin-like F-box; Serine/threonine protein phosphatase, BSU1 [Medicago truncatula] (GB:ABE78686.1); similar to Os11g0246200 [Oryza sativa (japonica cultivar-group)] (GB:NP_001067606.1); contains InterPro domain Cyclin-like F-box; (InterPro:IP…
AT5G27200	ACP5	encodes an acyl carrier protein
AT2G22720	NA	similar to unknown protein [Arabidopsis thaliana] (TAIR:AT4G37860.1); similar to expressed protein [Oryza sativa (japonica cultivar-group)] (GB:AAX96797.1); similar to conserved hypothetical protein [Oryza sativa (japonica cultivar-group)] (GB:AAX95431.1); similar to Os11g0296800 [Oryza sativa (japonica cultivar-group)] (GB:NP_001067723.1); contains InterPro domain Chromatin SPT2; (InterPro:IPR01…
AT1G51400	NA	photosystem II 5 kD protein; similar to PSBTN (photosystem II subunit T) [Arabidopsis thaliana] (TAIR:AT3G21055.1); similar to unknown [Brassica rapa] (GB:ABD91572.1)

## Sheet: AR-down-regulated
Supplementary Table 2: Table of genes similarly regulated between sly1-2 and Cvi ARvsD dry seeds (split into UP-regulated and DOWN-regulated sheets)
AGI identifier	Gene symbol	Description
AT3G17160	NA	similar to unknown protein [Arabidopsis thaliana] (TAIR:AT1G47970.1); similar to hypothetical protein 244.t00012 [Entamoeba histolytica HM-1:IMSS] (GB:XP_650128.1); similar to Os01g0332900 [Oryza sativa (japonica cultivar-group)] (GB:NP_001042934.1)
AT2G29380	HAI3	protein phosphatase 2C, putative / PP2C, putative; similar to protein phosphatase 2C, putative / PP2C, putative [Arabidopsis thaliana] (TAIR:AT1G07430.1); similar to protein phpsphatase 2C (PP2C) [Fagus sylvatica] (GB:CAB90633.1); contains InterPro domain Protein phosphatase 2C-like; (InterPro:IPR001932)
AT1G78580	ATTPS1, TPS1	Encodes an enzyme putatively involved in trehalose biosynthesis. The protein has a trehalose synthase (TPS)-like domain but no trehalose phosphatase (TPP)-like domain. ATTPS1 is able to complement yeast tps1 mutants in vivo. The gene product modulates cell growth but not cell differentiation by determining cell wall deposition and cell division., Encodes an enzyme putatively involved in trehalose…
AT1G77510	ATPDI6, ATPDIL1-2, PDI6	Encodes a protein disulfide isomerase-like (PDIL) protein, a member of a multigene family within the thioredoxin (TRX) superfamily., Encodes a protein disulfide isomerase-like (PDIL) protein, a member of a multigene family within the thioredoxin (TRX) superfamily., Encodes a protein disulfide isomerase-like (PDIL) protein, a member of a multigene family within the thioredoxin (TRX) superfamily.
AT5G07070	CIPK2, SnRK3.2	Encodes CBL-interacting protein kinase 2 (CIPK2)., Encodes CBL-interacting protein kinase 2 (CIPK2).
AT4G30530	NA	defense-related protein, putative; similar to defense-related protein, putative [Arabidopsis thaliana] (TAIR:AT2G23960.1); similar to defense-related protein [Brassica carinata] (GB:AAK50344.1); contains InterPro domain Glutamine amidotransferase class-I; (InterPro:IPR000991)
AT1G27030	NA	similar to unknown protein [Arabidopsis thaliana] (TAIR:AT1G27020.1); similar to unknown protein [Oryza sativa (japonica cultivar-group)] (GB:AAN05517.1); similar to Os10g0463800 [Oryza sativa (japonica cultivar-group)] (GB:NP_001064789.1); contains domain GatB/YqeY domain (SSF89095)
AT5G52920	PKP-BETA1, PKP1, PKP2	pyruvate kinase, putative; similar to pyruvate kinase, putative [Arabidopsis thaliana] (TAIR:AT1G32440.1); similar to Pyruvate kinase isozyme G, chloroplast precursor (GB:Q40546); similar to Pyruvate kinase [Medicago truncatula] (GB:ABE87102.1); similar to Os10g0571200 [Oryza sativa (japonica cultivar-group)] (GB:NP_001065454.1); contains InterPro domain Pyruvate kinase, beta-barrel-like; (InterP…
AT3G61990	NA	O-methyltransferase family 3 protein; similar to O-methyltransferase family 3 protein [Arabidopsis thaliana] (TAIR:AT3G62000.1); similar to Os08g0154000 [Oryza sativa (japonica cultivar-group)] (GB:NP_001061012.1); similar to O-methyltransferase [Nostoc sp. PCC 7120] (GB:NP_489219.1); contains InterPro domain SAM (and some other nucleotide) binding motif; (InterPro:IPR000051); contains InterPro d…
AT5G25210	NA	similar to unknown protein [Arabidopsis thaliana] (TAIR:AT4G32030.1)
AT1G73020	NA	similar to PREDICTED: similar to CG15270-PA, isoform A, partial [Bos taurus] (GB:XP_614009.2); similar to Os01g0706700 [Oryza sativa (japonica cultivar-group)] (GB:NP_001044018.1); contains InterPro domain Protein of unknown function DUF590; (InterPro:IPR007632)
AT1G14920	GAI, RGA2	Similar to a putative transcription factor and transcriptional coactivators. Repressor of GA responses and involved in gibberellic acid mediated signaling. Member of the DELLA proteins that restrain the cell proliferation and expansion that drives plant growth. The protein undergoes degradation in response to GA via 26S proteasome., Similar to a putative transcription factor and transcriptional c…
AT5G23110	NA	zinc finger (C3HC4-type RING finger) family protein; similar to zinc finger (C3HC4-type RING finger) family protein [Arabidopsis thaliana] (TAIR:AT1G73950.1); similar to Os04g0675200 [Oryza sativa (japonica cultivar-group)] (GB:NP_001054245.1); similar to H0103C06.6 [Oryza sativa (indica cultivar-group)] (GB:CAJ86102.1); similar to OSJNBa0018M05.18 [Oryza sativa (japonica cultivar-group)] (GB:CAE…
AT2G30860	ATGSTF7, ATGSTF9, GLUTTR	Encodes glutathione transferase belonging to the phi class of GSTs. Naming convention according to Wagner et al. (2002)., Encodes glutathione transferase belonging to the phi class of GSTs. Naming convention according to Wagner et al. (2002)., Encodes glutathione transferase belonging to the phi class of GSTs. Naming convention according to Wagner et al. (2002).
AT5G20280	ATSPS1F	Encodes a protein with putative sucrose-phosphate synthase activity.
AT1G72570	NA	DNA binding / transcription factor; similar to ANT (AINTEGUMENTA), DNA binding / transcription factor [Arabidopsis thaliana] (TAIR:AT4G37750.1); similar to Pathogenesis-related transcriptional factor and ERF [Medicago truncatula] (GB:ABE92434.1); contains InterPro domain Pathogenesis-related transcriptional factor and ERF; (InterPro:IPR001471); contains InterPro domain Lipoxygenase; (InterPro:IPR…
AT1G34130	STT3B	Encodes homolog of yeast STT3, a subunit of oligosaccharyltransferase.
AT1G03830	NA	guanylate-binding family protein; similar to GTP binding / GTPase [Arabidopsis thaliana] (TAIR:AT5G46070.1); similar to PREDICTED: similar to translocated promoter re (GB:XP_422300.2); similar to Os02g0307000 [Oryza sativa (japonica cultivar-group)] (GB:NP_001046641.1); contains InterPro domain Guanylate-binding protein; (InterPro:IPR003191)
AT5G20730	ARF7, BIP, IAA21, IAA23, IAA25, MSG1, NPH4, TIR5, ARF7, BIP, IAA21, IAA23, IAA25, MSG1, NPH4, TIR5, ARF7, BIP, IAA21, IAA23, IAA25, MSG1, NPH4, TIR5	Encodes an auxin-regulated transcriptional activator. Activates expression of IAA1 and IAA9 in the presence of auxin. Mutants affect blue light and gravitropic and auxin mediated growth responses. Together with AUX19, it is involved in the response to ethylene., Encodes an auxin-regulated transcriptional activator. Activates expression of IAA1 and IAA9 in the presence of auxin. Mutants affect blu…
AT3G22840	ELIP, ELIP1	Encodes an early light-inducible protein., Encodes an early light-inducible protein.
AT1G05460	SDE3	Encodes a protein with similarity to RNA helicases. Mutants are defective in post-transcriptional gene silencing.
AT1G74710	ATICS1, EDS16, ICS1, SID2	Encodes a protein with isochorismate synthase activity. Mutants fail to accumulate salicylic acid. Its function may be redundant with that of ICS2 (AT1G18870)., Encodes a protein with isochorismate synthase activity. Mutants fail to accumulate salicylic acid. Its function may be redundant with that of ICS2 (AT1G18870)., Encodes a protein with isochorismate synthase activity. Mutants fail to accum…
AT5G53660	AtGRF7	Growth regulating factor encoding transcription activator. One of the nine members of a GRF gene family, containing nuclear targeting domain. Involved in leaf development and expressed in shoot and flower.
AT3G52170	NA	DNA binding; similar to hydroxyproline-rich glycoprotein family protein [Arabidopsis thaliana] (TAIR:AT5G58210.4); similar to plastid DNA-binding protein [Brassica napus] (GB:BAD90706.1)
AT1G18100	E12A11	E12A11 protein (E12A11)
AT1G09620	NA	ATP binding / aminoacyl-tRNA ligase; similar to EMB2369 (EMBRYO DEFECTIVE 2369), ATP binding / aminoacyl-tRNA ligase [Arabidopsis thaliana] (TAIR:AT4G04350.1); similar to Leucyl-tRNA synthetase (ISS) [Ostreococcus tauri] (GB:CAL51574.1); similar to PREDICTED: similar to Leucyl-tRNA synthetase, cytoplasmic (Leucine--tRNA ligase) (LeuRS) [Canis familiaris] (GB:XP_535229.1); similar to PREDICTED: si…
AT5G58090	NA	glycosyl hydrolase family 17 protein; Identical to Putative glucan endo-1,3-beta-glucosidase 6 precursor (EC 3.2.1.39) ((1->3)-beta-glucan endohydrolase 6) ((1->3)-beta-glucanase 6) (Beta- 1,3-endoglucanase 6) (Beta-1,3-glucanase 6) [Arabidopsis Thaliana] (GB:Q93Z08;GB:Q9FGT5); similar to glycosyl hydrolase family 17 protein [Arabidopsis thaliana] (TAIR:AT4G31140.1); similar to Os02g0139300 [Oryz…
AT4G18650	NA	transcription factor-related; similar to ZW2 [Arabidopsis thaliana] (TAIR:AT1G58330.1); similar to predicted protein [Gossypium hirsutum] (GB:AAT64037.1)
AT5G40480	EMB3012	EMB3012 (EMBRYO DEFECTIVE 3012); similar to hypothetical protein DDBDRAFT_0187985 [Dictyostelium discoideum AX4] (GB:XP_636668.1); similar to Os09g0565500 [Oryza sativa (japonica cultivar-group)] (GB:NP_001063948.1); contains InterPro domain Bacterial Ig-like, group 2; (InterPro:IPR003343); contains InterPro domain Invasin/intimin cell-adhesion; (InterPro:IPR008964)
AT3G07360	ATPUB9, PUB9, ATPUB9, PUB9	armadillo/beta-catenin repeat family protein / U-box domain-containing protein; similar to armadillo/beta-catenin repeat family protein / U-box domain-containing protein [Arabidopsis thaliana] (TAIR:AT5G18320.1); similar to U box [Medicago truncatula] (GB:ABE90370.1); contains InterPro domain Armadillo; (InterPro:IPR000225), armadillo/beta-catenin repeat family protein / U-box domain-containing p…
AT3G18490	NA	aspartyl protease family protein; similar to aspartyl protease family protein [Arabidopsis thaliana] (TAIR:AT1G25510.1); similar to Os01g0598600 [Oryza sativa (japonica cultivar-group)] (GB:NP_001043485.1); similar to unknow protein [Oryza sativa (japonica cultivar-group)] (GB:AAT38006.1); similar to Os01g0140100 [Oryza sativa (japonica cultivar-group)] (GB:NP_001041979.1); contains InterPro doma…
AT5G18750	NA	DNAJ heat shock N-terminal domain-containing protein; similar to heat shock protein binding / unfolded protein binding [Arabidopsis thaliana] (TAIR:AT3G06340.2); similar to Os06g0535300 [Oryza sativa (japonica cultivar-group)] (GB:NP_001057790.1); similar to heat shock protein DnaJ N-terminal domain-containing protein [Musa acuminata] (GB:ABF69988.1); similar to Os01g0375100 [Oryza sativa (japoni…
ATCG00820	RPS19	Encodes a 6.8-kDa protein of the small ribosomal subunit.
AT1G55490	CPN60B, LEN1	encodes the beta subunit of the chloroplast chaperonin 60, a homologue of bacterial GroEL. Mutants in this gene develops lesions on its leaves, expresses systemic acquired resistance (SAR) and develops accelerated cell death to heat shock stress. The protein has molecular chaperone activity for suppressing protein aggregation in vitro., encodes the beta subunit of the chloroplast chaperonin 60, a…
AT5G61790	ATCNX1, CNX1	calnexin 1 (CNX1); Identical to Calnexin homolog 1 precursor (CNX1) [Arabidopsis Thaliana] (GB:P29402); similar to calnexin, putative [Arabidopsis thaliana] (TAIR:AT5G07340.1); similar to calnexin homolog (GB:AAA17742.1); similar to Concanavalin A-like lectin/glucanase [Medicago truncatula] (GB:ABE80216.1); similar to putative papillar cell-specific calnexin [Brassica napus] (GB:AAK84429.1); cont…
AT5G24590	ANAC091, TIP	Member of NAc protein family. Interacts with turnip crinkle virus (TCV) capsid protein. Transcription factor involved in regulating the defense response of Arabidopsis to TCV., Member of NAc protein family. Interacts with turnip crinkle virus (TCV) capsid protein. Transcription factor involved in regulating the defense response of Arabidopsis to TCV.
AT3G14160	NA	oxidoreductase, 2OG-Fe(II) oxygenase family protein; similar to oxidoreductase, 2OG-Fe(II) oxygenase family protein [Arabidopsis thaliana] (TAIR:AT3G14140.1); similar to oxidoreductase, 2OG-Fe oxygenase family protein, putative, expressed [Oryza sativa (japonica cultivar-group)] (GB:ABF99549.1); similar to Os03g0816500 [Oryza sativa (japonica cultivar-group)] (GB:NP_001051693.1); contains InterPr…
AT1G17550	HAB2	Protein Phosphatase 2C
AT5G47710	NA	C2 domain-containing protein; similar to C2 domain-containing protein [Arabidopsis thaliana] (TAIR:AT1G70790.1); similar to C2 domain containing protein [Brassica oleracea] (GB:ABD64985.1); contains InterPro domain C2; (InterPro:IPR000008); contains InterPro domain C2 calcium/lipid-binding region, CaLB; (InterPro:IPR008973)
AT5G05870	UGT76C1	UGT76C1 (UDP-GLUCOSYL TRANSFERASE 76C1); UDP-glycosyltransferase/ transferase, transferring glycosyl groups; Identical to Cytokinin-N-glucosyltransferase 1 (EC 2.4.1.-) (UGT76C1) [Arabidopsis Thaliana] (GB:Q9FI99); similar to UDP-glucoronosyl/UDP-glucosyl transferase family protein [Arabidopsis thaliana] (TAIR:AT5G05880.1); similar to UDP-glucose: chalcononaringenin 2'-O-glucosyltransferase [Dian…
AT2G28930	APK1B, APK1B	APK1B (Arabidopsis protein kinase 1B); kinase; Identical to Protein kinase APK1B, chloroplast precursor (EC 2.7.11.1) (APK1B) [Arabidopsis Thaliana] (GB:P46573;GB:Q9SLH5); similar to APK1A (Arabidopsis protein kinase 1A), kinase [Arabidopsis thaliana] (TAIR:AT1G07570.1); similar to protein kinase [Brassica rapa] (GB:BAD12263.1); contains InterPro domain Serine/threonine protein kinase; (InterPro:…
AT1G23800	ALDH2B, ALDH2B7	Encodes a mitochondrial aldehyde dehydrogenase; nuclear gene for mitochondrial product., Encodes a mitochondrial aldehyde dehydrogenase; nuclear gene for mitochondrial product.
AT4G03260	NA	leucine-rich repeat family protein; similar to protein binding [Arabidopsis thaliana] (TAIR:AT1G78230.1); similar to Os07g0106100 [Oryza sativa (japonica cultivar-group)] (GB:NP_001058703.1); similar to Os05g0501600 [Oryza sativa (japonica cultivar-group)] (GB:NP_001055971.1); similar to leucine-rich protein [Porphyromonas (GB:NP_905954.1); contains InterPro domain Leucine-rich repeat; (InterPro:…
AT3G47960	NA	proton-dependent oligopeptide transport (POT) family protein; similar to proton-dependent oligopeptide transport (POT) family protein [Arabidopsis thaliana] (TAIR:AT1G18880.1); similar to proton-dependent oligopeptide transport (POT) family protein [Arabidopsis thaliana] (TAIR:AT5G62680.1); similar to nitrate transporter NRT1-1 [Glycine max] (GB:BAB19756.1); similar to nitrate transporter NRT1-5 …
AT1G21750	ATPDI5, ATPDIL1-1, PDI5	Encodes a protein disulfide isomerase-like (PDIL) protein, a member of a multigene family within the thioredoxin (TRX) superfamily; isoform contains non-consensus GA donor splice site at intron 9, Encodes a protein disulfide isomerase-like (PDIL) protein, a member of a multigene family within the thioredoxin (TRX) superfamily; isoform contains non-consensus GA donor splice site at intron 9, Encod…
AT3G11410	AHG3, ATPP2CA, PP2CA	Encodes protein phosphatase 2C. Negative regulator of ABA signalling. Expressed in seeds during germination. mRNA up-regulated by drought and ABA., Encodes protein phosphatase 2C. Negative regulator of ABA signalling. Expressed in seeds during germination. mRNA up-regulated by drought and ABA., Encodes protein phosphatase 2C. Negative regulator of ABA signalling. Expressed in seeds during germina…
AT2G35040	NA	AICARFT/IMPCHase bienzyme family protein; similar to phosphoribosylaminoimidazolecarboxamide formyltransferase/IMP cyclohydrolase [Nicotiana tabacum] (GB:AAG40879.1); similar to putative aminoimidazolecarboximide ribonucleotide transformylase [Oryza sativa (japonica cultivar-group)] (GB:BAD11555.1); similar to aminoimidazolecarboximide ribonucleotide transformylase/inosine monophosphate cyclohydr…
AT4G32920	NA	glycine-rich protein; similar to glycine-rich protein [Arabidopsis thaliana] (TAIR:AT5G47020.1); similar to glycine-rich protein [Arabidopsis thaliana] (TAIR:AT5G11700.1); similar to hypothetical protein MtrDRAFT_AC144766g15v1 [Medicago truncatula] (GB:ABE91983.1); similar to Thiolase [Medicago truncatula] (GB:ABE80802.1); similar to hypothetical protein MtrDRAFT_AC146940g33v1 [Medicago truncatul…
AT4G23750	CRF2, TMO3	encodes a member of the ERF (ethylene response factor) subfamily B-5 of ERF/AP2 transcription factor family. The protein contains one AP2 domain. There are 7 members in this subfamily., encodes a member of the ERF (ethylene response factor) subfamily B-5 of ERF/AP2 transcription factor family. The protein contains one AP2 domain. There are 7 members in this subfamily.
AT5G54980	NA	integral membrane family protein; similar to integral membrane family protein [Arabidopsis thaliana] (TAIR:AT1G17200.1); similar to Os02g0219900 [Oryza sativa (japonica cultivar-group)] (GB:NP_001046315.1); similar to hypothetical protein [Gossypium hirsutum] (GB:CAC84114.1); contains InterPro domain Protein of unknown function DUF588; (InterPro:IPR006702); contains InterPro domain Conserved hypo…
AT3G01180	AtSS2	glycogen synthase, putative; similar to SSI (STARCH SYNTHASE I), transferase, transferring glycosyl groups [Arabidopsis thaliana] (TAIR:AT5G24300.1); similar to starch synthase II [Amaranthus cruentus] (GB:ABA64552.1); similar to granule bound starch synthase II precursor [Manihot esculenta] (GB:AAF13168.1); similar to Granule-bound starch synthase 2, chloroplast precursor (Granule-bound starch s…
AT3G61830	ARF18	ARF18 (AUXIN RESPONSE FACTOR 18); transcription factor; Identical to Auxin response factor 18 (ARF18) [Arabidopsis Thaliana] (GB:Q9C5W9;GB:Q9M355); similar to ARF11 (AUXIN RESPONSE FACTOR 11), transcription factor [Arabidopsis thaliana] (TAIR:AT2G46530.1); similar to Os02g0557200 [Oryza sativa (japonica cultivar-group)] (GB:NP_001047137.1); similar to auxin response factor 1 [Gossypium barbadense…
AT3G04790	NA	ribose 5-phosphate isomerase-related; similar to ribose-5-phosphate isomerase [Arabidopsis thaliana] (TAIR:AT2G01290.1); similar to putative ribose-5-phosphate isomerase [Oryza sativa (japonica cultivar-group)] (GB:BAC83440.1); similar to Os07g0176900 [Oryza sativa (japonica cultivar-group)] (GB:NP_001059023.1); contains InterPro domain Ribose 5-phosphate isomerase; (InterPro:IPR004788)
AT5G24810	NA	ABC1 family protein; similar to ATATH13 (ABC2 homolog 13) [Arabidopsis thaliana] (TAIR:AT5G64940.2); similar to Os06g0701300 [Oryza sativa (japonica cultivar-group)] (GB:NP_001058483.1); similar to hypothetical protein Swol_1468 [Syntrophomonas wolfei subsp. wolfei str. Goettingen] (GB:YP_754144.1); contains InterPro domain Penicillin-binding protein, transpeptidase fold; (InterPro:IPR012338); co…
AT2G36370	NA	ubiquitin-protein ligase; similar to F-box family protein (FBL3) [Arabidopsis thaliana] (TAIR:AT5G01720.1); similar to PREDICTED: similar to F-box and leucine-rich repeat protein 13 isoform 5 [Macaca mulatta] (GB:XP_001085130.1); similar to Os01g0968600 [Oryza sativa (japonica cultivar-group)] (GB:NP_001045519.1); similar to PREDICTED: similar to F-box and leucine-rich repeat protein 13 isoform 4…
AT5G53990	NA	glycosyltransferase family protein; similar to glycosyltransferase family protein [Arabidopsis thaliana] (TAIR:AT1G64920.1); similar to glycosyltransferase family protein [Arabidopsis thaliana] (TAIR:AT4G09500.2); similar to glycosyltransferase family protein [Arabidopsis thaliana] (TAIR:AT1G64910.1); similar to glucosyltransferase [Ipomoea nil] (GB:BAD95881.1); contains InterPro domain UDP-glucu…
AT3G05100	NA	similar to hypothetical protein WH5701_03239 [Synechococcus sp. WH 5701] (GB:ZP_01084496.1); similar to Os07g0667400 [Oryza sativa (japonica cultivar-group)] (GB:NP_001060575.1); contains InterPro domain Methyltransferase type 12; (InterPro:IPR013217); contains InterPro domain SAM (and some other nucleotide) binding motif; (InterPro:IPR000051)
AT1G80090	NA	CBS domain-containing protein; similar to CBS domain-containing protein [Arabidopsis thaliana] (TAIR:AT1G15330.1); similar to SNF4b [Medicago truncatula] (GB:AAO61675.1); contains InterPro domain CBS; (InterPro:IPR000644)
AT5G20150	ATSPX1, SPX1	SPX (SYG1/Pho81/XPR1) domain-containing protein; similar to SPX (SYG1/Pho81/XPR1) domain-containing protein [Arabidopsis thaliana] (TAIR:AT2G26660.1); similar to Os06g0603600 [Oryza sativa (japonica cultivar-group)] (GB:NP_001058013.1); similar to IDS4-like protein [Solanum lycopersicum] (GB:CAG29394.1); contains InterPro domain SPX, N-terminal; (InterPro:IPR004331), SPX (SYG1/Pho81/XPR1) domain-…
AT1G21460	NA	nodulin MtN3 family protein; similar to nodulin MtN3 family protein [Arabidopsis thaliana] (TAIR:AT4G10850.1); similar to Os05g0426000 [Oryza sativa (japonica cultivar-group)] (GB:NP_001055599.1); similar to senescence-associated protein-like [Oryza sativa (japonica cultivar-group)] (GB:BAB92465.1); similar to Os01g0881300 [Oryza sativa (japonica cultivar-group)] (GB:NP_001044998.1); contains Int…
AT5G10510	AIL6, PLT3	AIL6 (AINTEGUMENTA-LIKE 6); DNA binding / transcription factor; similar to AIL7 (AINTEGUMENTA-LIKE 7), DNA binding / transcription factor [Arabidopsis thaliana] (TAIR:AT5G65510.1); similar to 117M18_31 [Brassica rapa] (GB:AAZ66950.1); contains InterPro domain Pathogenesis-related transcriptional factor and ERF; (InterPro:IPR001471), AIL6 (AINTEGUMENTA-LIKE 6); DNA binding / transcription factor; …
AT2G28780	NA	similar to unknown protein [Arabidopsis thaliana] (TAIR:AT3G09450.1); similar to P-type trefoil [Medicago truncatula] (GB:ABD32899.1)
AT5G50360	NA	similar to unknown protein [Arabidopsis thaliana] (TAIR:AT5G63350.1); similar to hypothetical protein MtrDRAFT_AC135505g13v1 [Medicago truncatula] (GB:ABE82027.1)
AT4G23990	ATCSLG3, CSLG3	encodes a protein similar to cellulose synthase, encodes a protein similar to cellulose synthase
AT5G39350	NA	pentatricopeptide (PPR) repeat-containing protein; similar to pentatricopeptide (PPR) repeat-containing protein [Arabidopsis thaliana] (TAIR:AT4G18750.1); similar to pentatricopeptide (PPR) repeat-containing protein-like [Oryza sativa (japonica cultivar-group)] (GB:BAD27693.1); contains InterPro domain Pentatricopeptide repeat; (InterPro:IPR002885); contains InterPro domain Protein prenyltransfer…
AT2G41620	NA	nucleoporin interacting component family protein; Identical to Uncharacterized protein At2g41620 [Arabidopsis Thaliana] (GB:O22224;GB:Q94CF2); similar to nucleoporin interacting component-related [Arabidopsis thaliana] (TAIR:AT3G57350.1); similar to Nucleoporin interacting component; Protein prenyltransferase [Medicago truncatula] (GB:ABD28395.1); similar to Os03g0349000 [Oryza sativa (japonica c…
AT3G25260	NA	proton-dependent oligopeptide transport (POT) family protein; similar to proton-dependent oligopeptide transport (POT) family protein [Arabidopsis thaliana] (TAIR:AT3G25280.1); similar to TGF-beta receptor, type I/II extracellular re (GB:ABE79322.1); contains InterPro domain TGF-beta receptor, type I/II extracellular region; (InterPro:IPR000109)
AT5G50770	AtHSD6	short-chain dehydrogenase/reductase (SDR) family protein; similar to short-chain dehydrogenase/reductase (SDR) family protein [Arabidopsis thaliana] (TAIR:AT5G50700.1); similar to short-chain dehydrogenase/reductase (SDR) family protein [Arabidopsis thaliana] (TAIR:AT5G50600.1); similar to steroleosin [Sesamum indicum] (GB:AAL09328.1); contains InterPro domain Short-chain dehydrogenase/reductase …
AT5G06980	NA	similar to unknown protein [Arabidopsis thaliana] (TAIR:AT3G12320.1)
AT2G22300	CAMTA3, SR1	ethylene-responsive calmodulin-binding protein, putative (SR1); Identical to Calmodulin-binding transcription activator 3 (Signal-responsive protein 1) (Ethylene-induced calmodulin-binding protein a) (EICBP.a) (Ethylene-induced calmodulin-binding protein 1) (EICBP1) (CMTA3) [Arabidopsis Thaliana] (GB:Q8GSA7;GB:Q9FPR9;GB:Q9SID7); similar to calmodulin binding [Arabidopsis thaliana] (TAIR:AT5G64220…
AT5G40760	G6PD6	Encodes a cytosolic glucose-6-phosphate dehydrogenase that is insensitive to reduction by DTT and whose mRNA is expressed ubiquitously.
AT1G30610	EMB2279, EMB88	EMB2279 (EMBRYO DEFECTIVE 2279); binding; similar to EMB1408 (EMBRYO DEFECTIVE 1408), binding [Arabidopsis thaliana] (TAIR:AT5G67570.1); similar to pentatricopeptide (PPR) repeat-containing protein-like [Oryza sativa (japonica cultivar-group)] (GB:BAD73375.1); similar to Os01g0674700 [Oryza sativa (japonica cultivar-group)] (GB:NP_001043842.1); contains InterPro domain Pentatricopeptide repeat; (…
AT5G66530	NA	aldose 1-epimerase family protein; similar to aldose 1-epimerase family protein [Arabidopsis thaliana] (TAIR:AT5G57330.1); similar to Os09g0327400 [Oryza sativa (japonica cultivar-group)] (GB:NP_001062890.1); similar to apospory-associated protein C; APOC [Chlamydomonas reinhardtii] (GB:AAF34174.1); contains InterPro domain Galactose mutarotase-like; (InterPro:IPR011013); contains InterPro domain…
AT5G55470	ATNHX3, NHX3	member of Sodium proton exchanger family, member of Sodium proton exchanger family
AT5G58350	WNK4, ZIK2	Encodes a member of the WNK family (9 members in all) of protein kinases, the structural design of which is clearly distinct from those of other known protein kinases, such as receptor-like kinases and mitogen-activated protein kinases. Its transcription is under the control of circadian rhythms., Encodes a member of the WNK family (9 members in all) of protein kinases, the structural design of w…
AT5G64210	AOX2	encodes an isoform of alternative oxidase, which is expressed in rosettes, stems, and roots. Transcript accumulates in dry seeds and decreased upon germination and is not affected by actinomycin A. Protein is localized to mitochondria.
AT4G24270	EMB140, EMB140	RNA recognition motif (RRM)-containing protein; similar to crooked neck protein, putative / cell cycle protein, putative [Arabidopsis thaliana] (TAIR:AT5G45990.1); similar to Os08g0113200 [Oryza sativa (japonica cultivar-group)] (GB:NP_001060838.1); similar to hypothetical protein LOC558581 [Danio rerio] (GB:NP_001025289.1); contains InterPro domain Lsm interaction; (InterPro:IPR008669); contains…
AT1G07380	NA	ceramidase family protein; similar to ceramidase family protein [Arabidopsis thaliana] (TAIR:AT5G58980.1); similar to ceramidase family protein [Arabidopsis thaliana] (TAIR:AT2G38010.1); similar to Os01g0624000 [Oryza sativa (japonica cultivar-group)] (GB:NP_001043618.1); similar to Neutral/alkaline nonlysosomal ceramidase [Medicago truncatula] (GB:ABE89511.1); contains InterPro domain Neutral/al…
AT3G10570	CYP77A6	member of CYP77A
AT2G32950	ATCOP1, COP1, DET340, EMB168, FUS1	Represses photomorphogenesis and induces skotomorphogenesis in the dark. Contains a ring finger zinc-binding motif, a coiled-coil domain, and several WD-40 repeats, similar to G-beta proteins. The C-terminus has homology to TAFII80, a subunit of the TFIID component of the RNA polymerase II of Drosophila. Nuclear localization in the dark and cytoplasmic in the light., Represses photomorphogenesis …
AT4G17960	NA	similar to unknown protein [Arabidopsis thaliana] (TAIR:AT5G46620.1); similar to Os02g0128100 [Oryza sativa (japonica cultivar-group)] (GB:NP_001045767.1)
AT3G11510	NA	40S ribosomal protein S14 (RPS14B); Identical to 40S ribosomal protein S14-2 (RPS14B) [Arabidopsis Thaliana] (GB:Q9CAX6); Identical to 40S ribosomal protein S14-1 (RPS14A) [Arabidopsis Thaliana] (GB:Q9SIH0); similar to 40S ribosomal protein S14 (RPS14A) [Arabidopsis thaliana] (TAIR:AT2G36160.1); similar to cytoplasmic ribosomal protein S14 [Brassica napus] (GB:AAO41731.1); contains InterPro domai…
AT4G26620	NA	sucrase-related; similar to sucrase-related [Arabidopsis thaliana] (TAIR:AT5G55900.1); similar to Clostridium pasteurianum ferredoxin homolog [Solanum tuberosum] (GB:AAB33256.1); similar to Os02g0725100 [Oryza sativa (japonica cultivar-group)] (GB:NP_001047981.1); contains InterPro domain Thioredoxin-like fold; (InterPro:IPR012336); contains InterPro domain Sucraseferredoxin-like; (InterPro:IPR00…
AT5G06180	NA	similar to unknown protein [Arabidopsis thaliana] (TAIR:AT5G22350.1); similar to OSIGBa0137L20.3 [Oryza sativa (indica cultivar-group)] (GB:CAH66474.1); similar to Protein of unknown function DUF1022 [Caulobacter sp. K31] (GB:ZP_01422054.1); similar to Os04g0414000 [Oryza sativa (japonica cultivar-group)] (GB:NP_001052751.1); contains InterPro domain Protein of unknown function DUF1022; (InterPro…
AT3G15790	ATMBD11, MBD11	Protein containing methyl-CpG-binding domain.Has sequence similarity to human MBD proteins., Protein containing methyl-CpG-binding domain.Has sequence similarity to human MBD proteins.
AT3G09540	NA	pectate lyase family protein; similar to pectate lyase family protein [Arabidopsis thaliana] (TAIR:AT3G55140.1); similar to Os01g0546800 [Oryza sativa (japonica cultivar-group)] (GB:NP_001043284.1); similar to putative pectate lyase [Oryza sativa (japonica cultivar-group)] (GB:BAD73403.1); contains InterPro domain Virulence factor, pectin lyase fold; (InterPro:IPR011050); contains InterPro domain…
AT2G14170	ALDH6B2	Arabidopsis thaliana methylmalonate-semialdehyde dehydrogenase
AT4G22340	NA	phosphatidate cytidylyltransferase, putative / CDP-diglyceride synthetase, putative; similar to ATCDS1 (CDP-diacylglycerol synthase 1), phosphatidate cytidylyltransferase [Arabidopsis thaliana] (TAIR:AT1G62430.1); similar to Os01g0758400 [Oryza sativa (japonica cultivar-group)] (GB:NP_001044302.1); similar to Phosphatidate cytidylyltransferase [Medicago truncatula] (GB:ABD33020.1); similar to Pho…
AT3G45980	H2B, HTB9	histone H2B; Identical to Histone H2B.6 (HTB9) (H2BAt) (H2B) [Arabidopsis Thaliana] (GB:O23629); similar to histone H2B [Arabidopsis thaliana] (TAIR:AT5G59910.1); similar to Histone H2B (GB:O22582); contains InterPro domain Histone-fold; (InterPro:IPR009072); contains InterPro domain Histone core; (InterPro:IPR007125); contains InterPro domain Histone-fold/TFIID-TAF/NF-Y; (InterPro:IPR007124); co…
AT4G17730	ATSYP23, SYP23	member of SYP2 Gene Family, member of SYP2 Gene Family
AT2G05830	NA	GTP binding / translation initiation factor; similar to GTP binding / translation initiation factor [Arabidopsis thaliana] (TAIR:AT3G07300.2); similar to CIG2 [Nicotiana tabacum] (GB:BAB63262.1); contains InterPro domain Initiation factor 2B alpha/beta/delta; (InterPro:IPR011559); contains InterPro domain Initiation factor 2B related; (InterPro:IPR000649), eukaryotic translation initiation factor…
AT3G14350	SRF7, SRF7	leucine-rich repeat transmembrane protein kinase, putative; similar to leucine-rich repeat transmembrane protein kinase, putative [Arabidopsis thaliana] (TAIR:AT1G53730.1); similar to Protein kinase [Medicago truncatula] (GB:ABE82074.1); similar to putative leucine-rich repeat transmembrane protein kinase [Isatis tinctoria] (GB:ABB20817.1); similar to leucine-rich repeat transmembrane protein kin…
AT1G20870	NA	similar to unknown protein [Arabidopsis thaliana] (TAIR:AT1G54850.1); similar to HSP20-like chaperone [Medicago truncatula] (GB:ABE82163.1); contains InterPro domain HSP20-like chaperone; (InterPro:IPR008978)
AT5G37600	ATGLN1;1, ATGSR1, GLN1;1, GSR	encodes a cytosolic glutamine synthetase, the enzyme has high affinity with substrate ammonium, encodes a cytosolic glutamine synthetase, the enzyme has high affinity with substrate ammonium, encodes a cytosolic glutamine synthetase, the enzyme has high affinity with substrate ammonium, encodes a cytosolic glutamine synthetase, the enzyme has high affinity with substrate ammonium
AT5G23740	RPS11-BETA	Encodes a putative ribosomal protein S11 (RPS11-beta).
AT5G23570	ATSGS3, SGS3	Required for posttranscriptional gene silencing and natural virus resistance.SGS3 is a member of an 'unknown' protein family. Members of this family have predicted coiled coiled domains suggesting oligomerization and a potential zinc finger domain. Involved in the production of trans-acting siRNAs, through direct or indirect stabilization of cleavage fragments of the primary ta-siRNA transcript. …
AT1G13440	GAPC-2, GAPC2, GAPC-2, GAPC2	GAPC-2; glyceraldehyde-3-phosphate dehydrogenase; similar to GAPC (GLYCERALDEHYDE-3-PHOSPHATE DEHYDROGENASE C SUBUNIT), glyceraldehyde-3-phosphate dehydrogenase [Arabidopsis thaliana] (TAIR:AT3G04120.1); similar to Glyceraldehyde-3-phosphate dehydrogenase, cytosolic (GB:P04796); similar to cystolic glyceraldehyde-3-phosphate dehydrogenase (GB:AAA32794.1); contains InterPro domain Glyceraldehyde-3…
AT5G63110	ATHDA6, AXE1, HDA6, RPD3B, RTS1, SIL1	RPD3-like histone deacetylase. HDA6 mutations specifically increase the expression of auxin-responsive transgenes, suggesting a role in transgene silencing., RPD3-like histone deacetylase. HDA6 mutations specifically increase the expression of auxin-responsive transgenes, suggesting a role in transgene silencing., RPD3-like histone deacetylase. HDA6 mutations specifically increase the expression …
AT5G38480	GRF3, RCI1	general regulatory factor, a 14-3-3 gene, general regulatory factor, a 14-3-3 gene
AT5G56970	ATCKX3, CKX3	It encodes a protein whose sequence is similar to cytokinin oxidase/dehydrogenase, which catalyzes the degradation of cytokinins., It encodes a protein whose sequence is similar to cytokinin oxidase/dehydrogenase, which catalyzes the degradation of cytokinins.
AT4G09800	RPS18C	encodes a ribosomal protein S18C, a constituent of the small subunit of the ribosomal complex
